# Supplementary material for: No difference in endothelial microvasculation measured by peripheral arterial tonometry in patients with Sjögren’s disease and matched controls
Source: Frontiers journal article supplement (doi:10.3389/fmed.2025.1563796), 2025-07-09

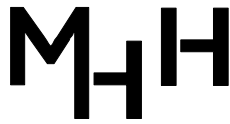

**Medizinische Hochschule  
Hannover**

**Zentrum Innere Medizin  
Klinik für Rheumatologie und Immunologie  
Prof. Dr. med. T. Witte, Direktor**

Telefon: 0511 532- 6656  
Fax: 0511 532- 9067  
immunologie@mh-hannover.de  
www.mh-hannover.de/kir.html

Carl-Neuberg-Straße 1  
30625 Hannover  
Telefon: 0511 532-0  
www.mh-hannover.de

**‘Comparison of endothelial function in primary Sjögren's syndrome compared to healthy controls using EndoPat® measurements’**

### **EndoPat® measurements study protocol**

#### **Preparations**

##### **1. patient preparations in advance**

- Fast for 4 hours beforehand
- No coffee, tobacco for 8 hours
- Continue long-term medication as normal
- Take off watches, rings + jewellery on the fingers

Prior to the procedure, patients were informed of the preparations involved by means of an email communication.

##### **2. materials**

- Armrests
- Leg roll
- Cushion
- Blood pressure monitor
- Manual blood pressure cuff
- 2 pneumatic end probes = tubes
- 

##### **3. patient positioning**

- Patients must lie relaxed
- Arms on the armrests + leg roll under the knees
- Patients must not speak + move during measurement (risk of artefacts)
- stop the examination in case of pain

##### **4. querying patient information**

- age
- height
- weight

##### **5. patient inspection**

- injuries to the fingers?

6. blood pressure measurement
  - measure RR on the control arm (no tourniquet is applied here later)
  - serves to select the appropriate tourniquet pressure
7. attach manual blood pressure cuff
  - to be attached to the right arm
  - is stowed here during the measurement
8. attach 'tubes' to the index fingers of both hands
  - if index finger is not possible, attach to the same side of another finger
  - note orientation between hand and cable
  - sample 1 = right hand
  - sample 2 = left hand

### Measurement procedure

1. open the programme
2. patient control → inflate
3. enter patient data → inflate
4. start programme with 'Go'
4. **Record 5 minutes baseline:** no pressure on manual blood pressure cuff
5. **5 minutes of occlusion:** approx. 20-30 mmHg (60mmHg) above measured systolic blood pressure, start low, increase until 0 line is visible
6. **Record 5 minutes reactive hyperaemie period** (post occlusion): without pressure
7. end programme + save in study folder + print
8. The software from Itamar Medical directly processes these measurements and independently calculates the RHI.

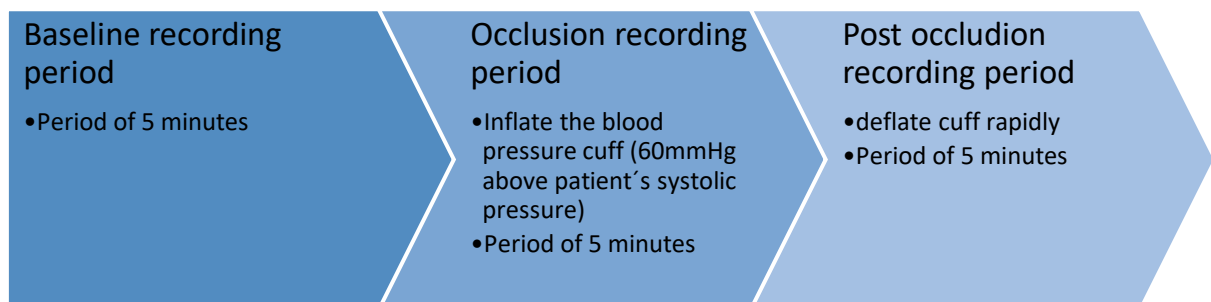

Supplement: Data_Sheet_1.pdf [file Data_Sheet_1.pdf]
